# Supplementary material for: Evodiamine Eliminates Colon Cancer Stem Cells via Suppressing Notch and Wnt Signaling
Source: PubMed Central journal article supplement (PMC6943729; doi:10.3390/molecules24244520), 2019-12-10
Supplement: molecules-24-04520-s001.pdf [file molecules-24-04520-s001.pdf]

HT29

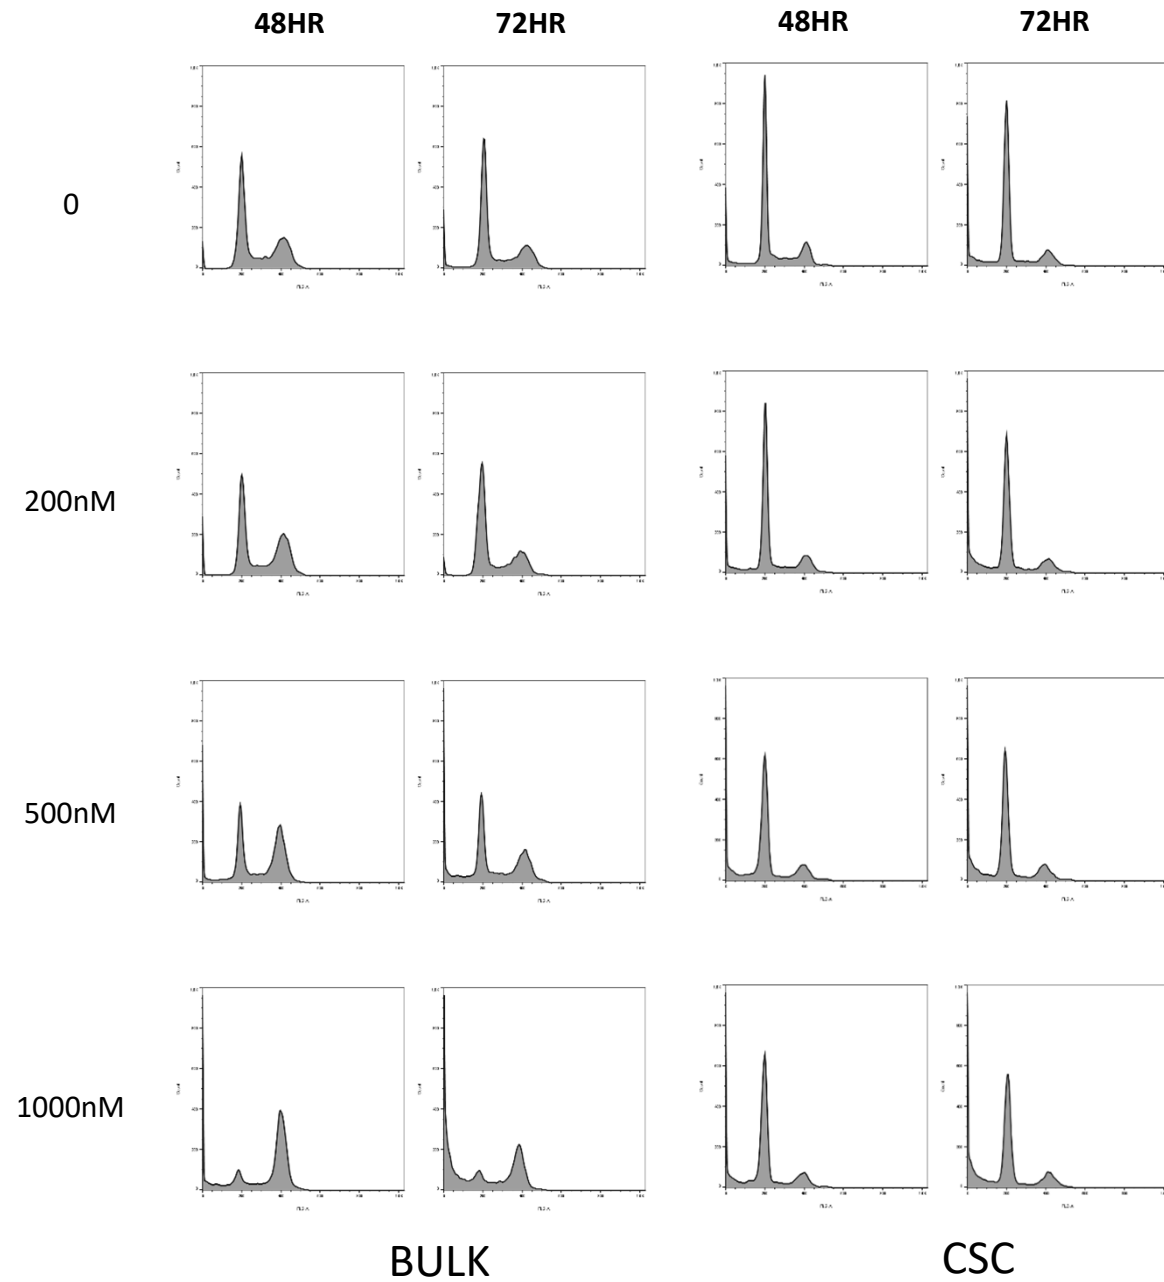

SW480

Supplementary Figure 2

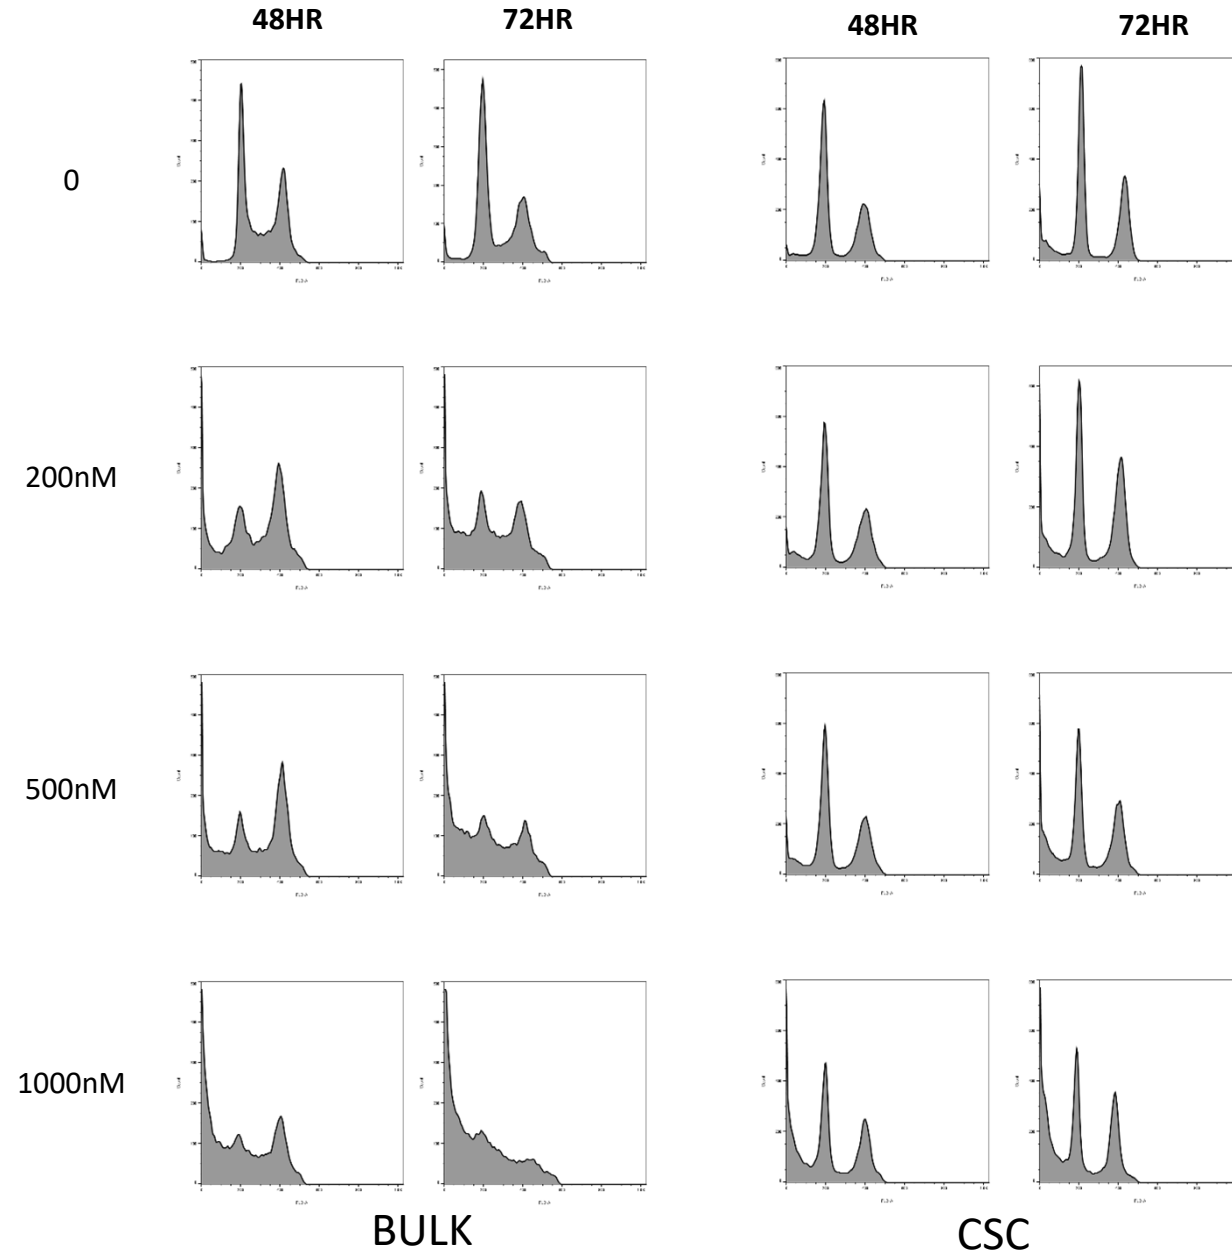

SW480, BCC

16HR

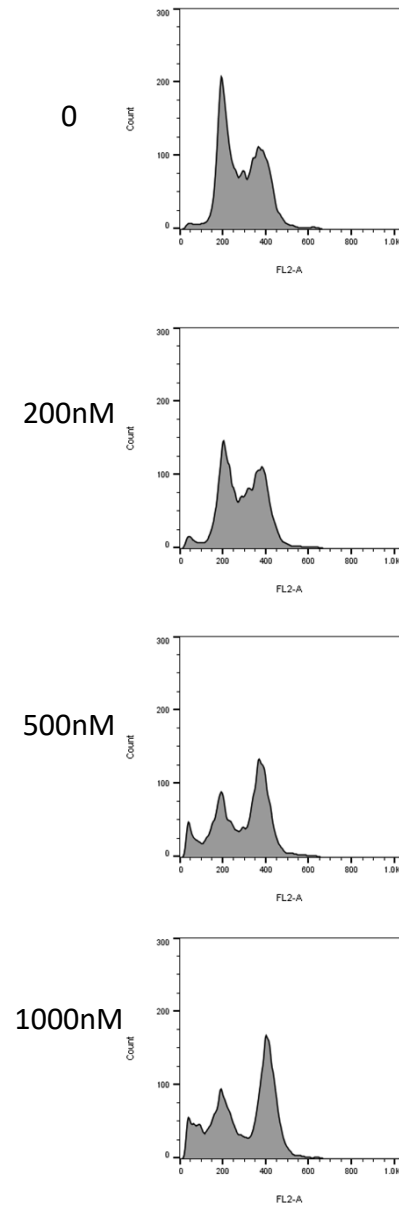

16HR

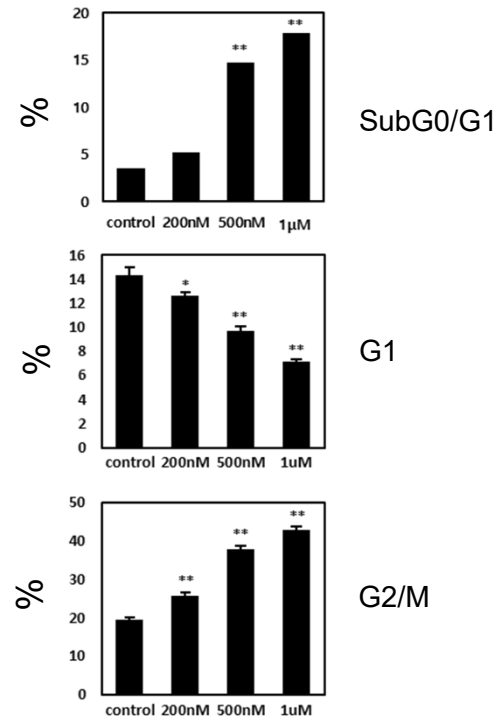

Supplementary Figure 4

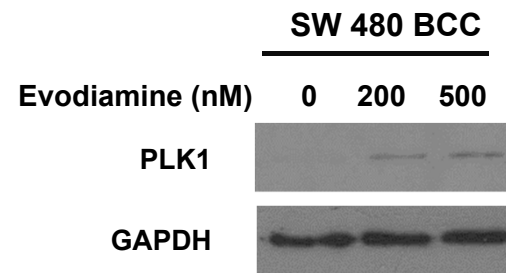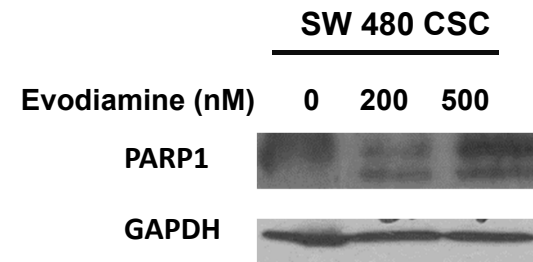

SW480 cells 48hrs

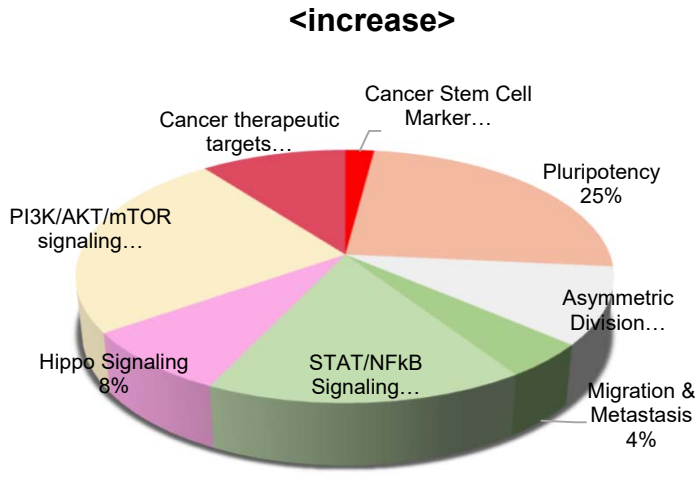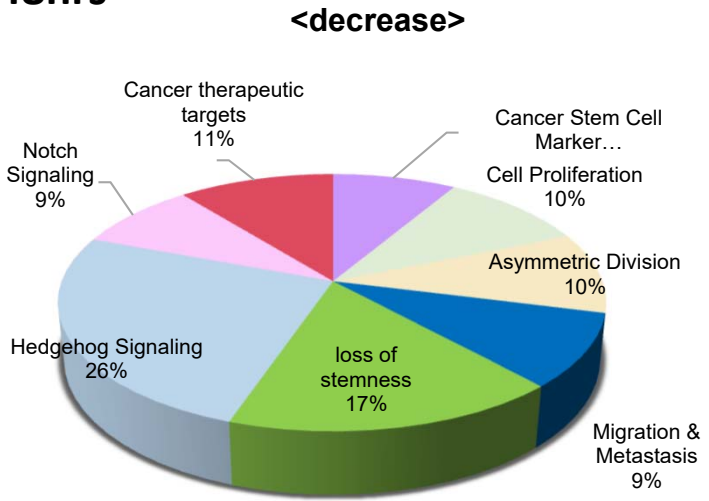

HT29 cells 72 hrs

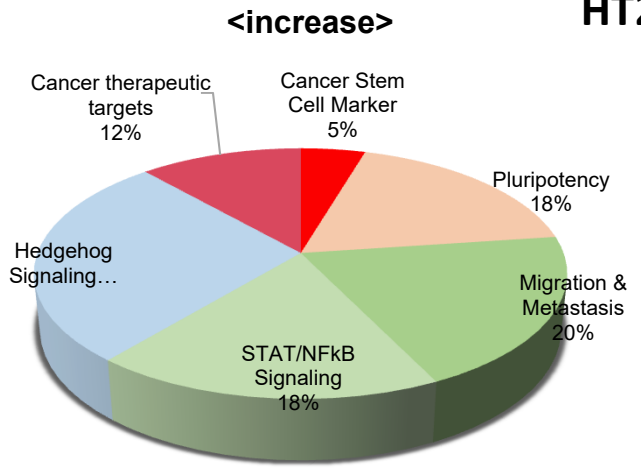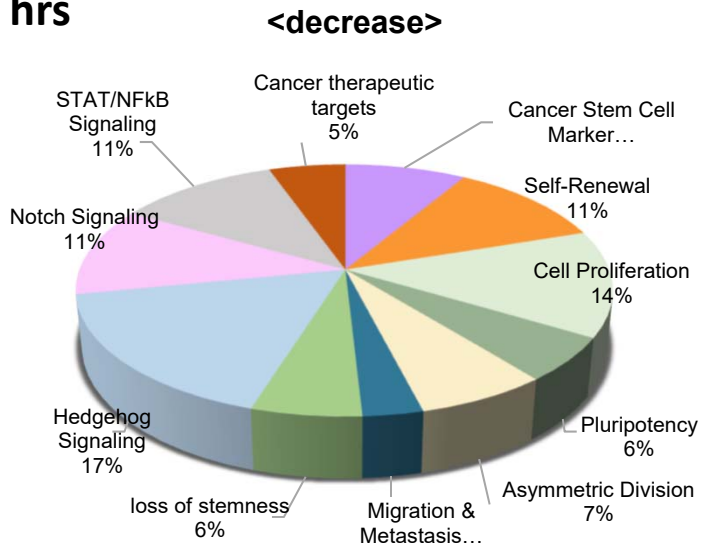

Supplementary Figure 6a

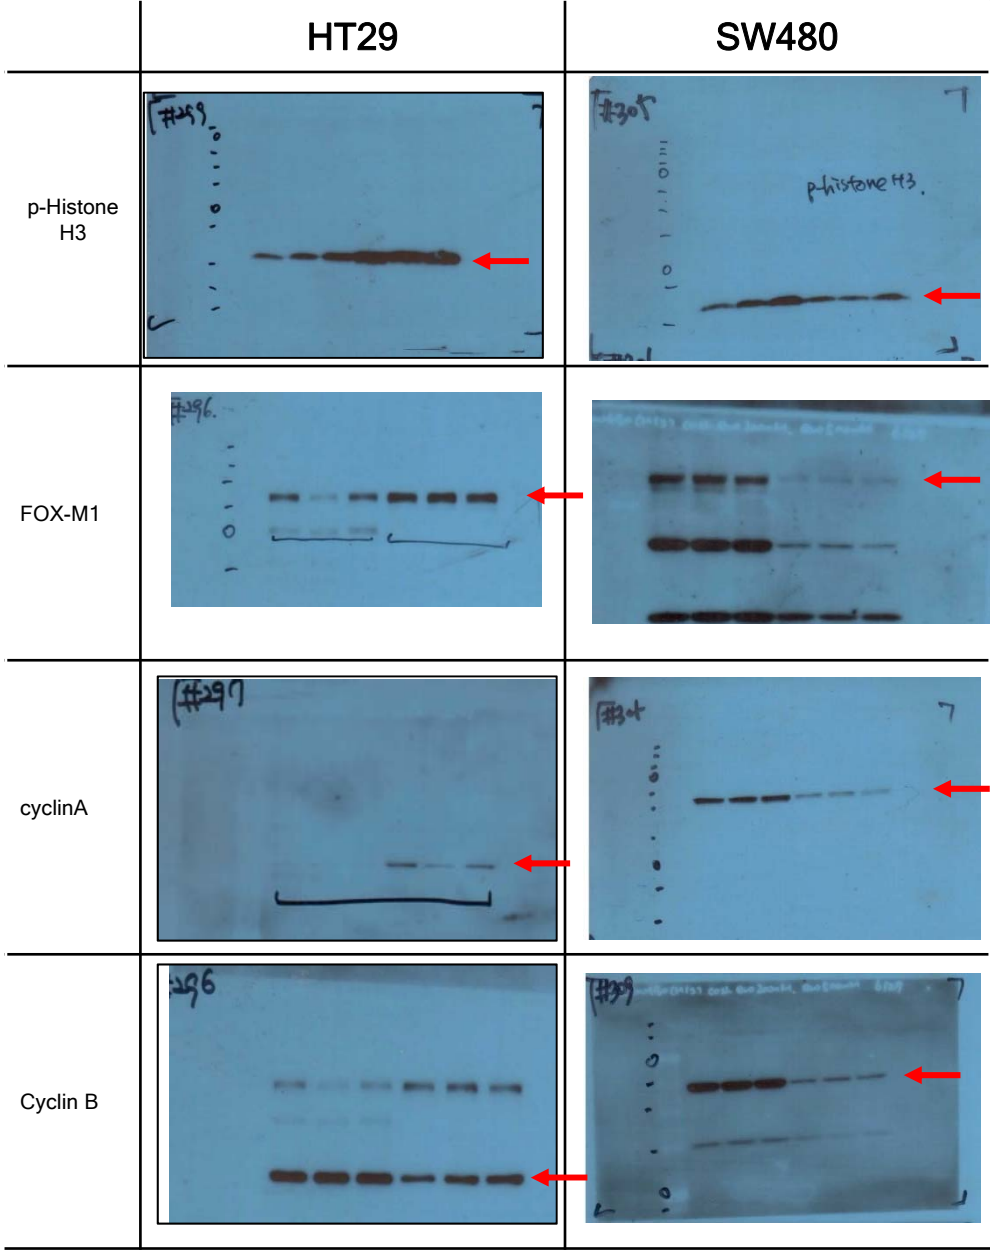

Supplementary Figure 6l

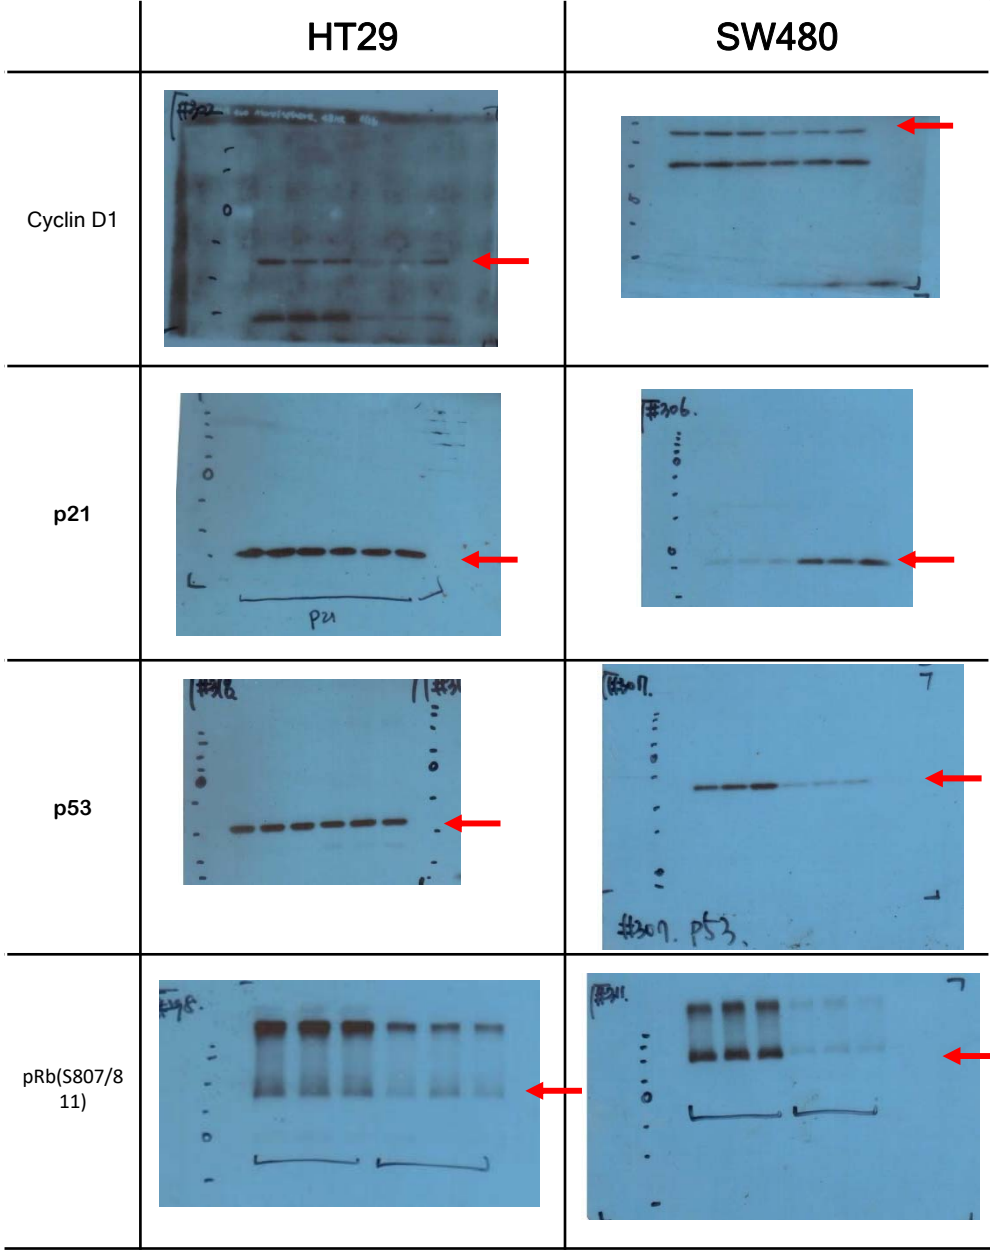

Supplementary Figure 6b

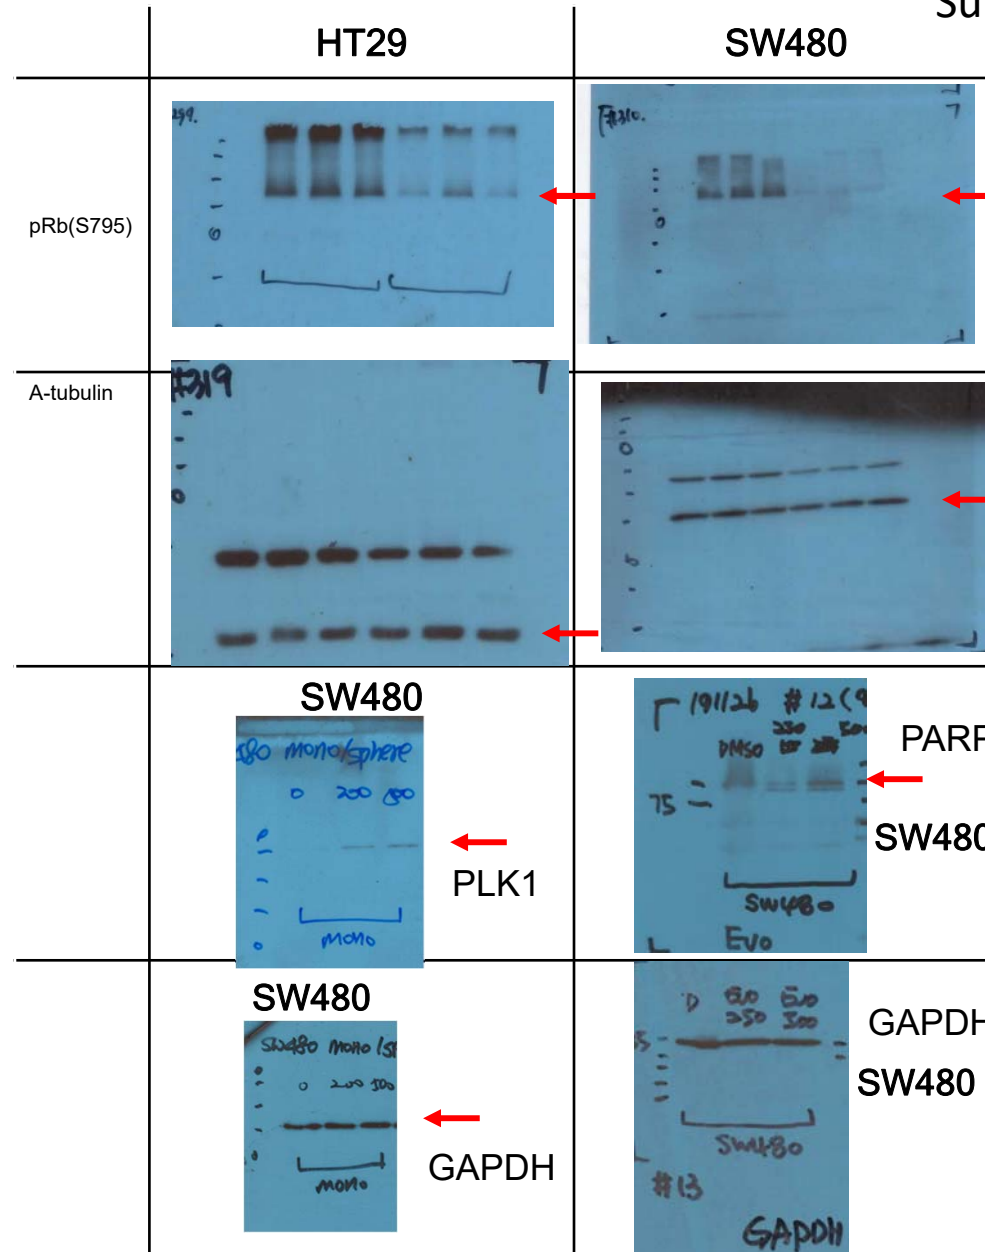



Supplementary Table 1. Realtime RT-PCR primer, used.

| GENE   | Sequence (5'→3')                                                                 |
|--------|----------------------------------------------------------------------------------|
| CD133  | F : TCA GTG AGA AAG TGG CAT CG<br>R : TGT TGT GAT GGG CTT GTC AT                 |
| FGFR3  | F : GAG AAC AAG TTT GGC AGA AT<br>R : CGT CACTGT ACA CCT TGC AG                  |
| FZD9   | F : TCC AGT ACG TGG AGA AGA GC<br>R : CAT GGA GAG GAA GAT GAT GG                 |
| GAPDH  | F : TGC ACC ACC AAC TGC TTA GC<br>R : GGC ATG GAC TGT GGT CAT GAG                |
| GLI1   | F : CCC AAT CAC AAG TCA GGT TCC T<br>R : CCT ATG TGA AGC CCT ATT TGC C           |
| HES1   | F : GAG CAC AGA AAG TCA TCA AAG CCT ATC<br>R : GCC GGG AGC TAT CTT TCT TAA GTG C |
| HES5   | F : TGG AGA AGG CCG ACA TCC T<br>R : GGC GAC GAA GGC TTT GC                      |
| L32    | F : CAA CAT TGG TTA TGG AAG CAA CA;<br>R : TGA CGT TGT GGA CCA GGA ACT           |
| LEF1   | F : AGG AAC ATC CCC ACA CTG AC<br>R : AGG TCT TTT TGG CTC CTG CT                 |
| LRP5   | (PPH02315F-200, Qiagen)                                                          |
| NOTCH1 | F : CAA CAT CCA GGA CAA CAT GG<br>R : GGA CTT GCC CAG GTC ATC TA                 |
| SCD1   | F : TGC CCA CCA CAA GTT TTC AG<br>R : CAT CAG CAA GCC AGG TTT GT                 |
| SMO    | (PPH02222C-200, Qiagen)                                                          |

Supplementary Table 2. Antibody list

| <b>Abs</b>                         | <b>Manufacture</b>  | <b>Cat. #</b> |
|------------------------------------|---------------------|---------------|
| <b><math>\alpha</math>-tubulin</b> | Santa Cruise        | sc23948       |
| <b>Cyclin A</b>                    | Cell signaling      | #4656         |
| <b>Cyclin B1</b>                   | Cell signaling      | #4138         |
| <b>Cyclin D1</b>                   | Cell signaling      | #2978         |
| <b>FoxM1</b>                       | Cell signaling      | #5436         |
| <b>P21</b>                         | Cell signaling      | #2947         |
| <b>P53</b>                         | Santa Cruise        | sc129         |
| <b>p-Histone H3</b>                | Cell signaling      | #3377         |
| <b>pRB(S795)</b>                   | Cell signaling      | #9301         |
| <b>pRB(S807/S811)</b>              | Cell signaling      | #856          |
| <b>Histone 3</b>                   | LifeSpan Bioscience | LS-C413067    |
| <b>PLK-1</b>                       | Santa Cruise        | sc55504       |
